# Supplementary material
Source: PubMed Central journal article supplement (PMC6203317)
Supplement: NIHMS80235-supplement-Supplementary_table.pdf [file NIHMS80235-supplement-Supplementary_table.pdf]

Supplementary table 1a. Quality assessment for cohort studies examining the association between rapid weight gain during infancy and later adiposity outcome<sup>1</sup>

| Reference              | Clearly focused question | Subjects recruited from same population | Participation rate | Free of outcome at baseline of the study <sup>a</sup> | Drop-out rate (<20%) | Comparison made between participants and drop-outs | Clearly defined outcome | Assessment of outcome is made blinded to exposure <sup>b</sup> | Assessment of exposure reliable | Validity of outcome measure | Repeated exposure measure <sup>c</sup> | Adequate confounding adjustment <sup>d</sup> | Confidence interval provided | Sample size or power justification | Declare of funding | Quality rating <sup>e</sup> |
|------------------------|--------------------------|-----------------------------------------|--------------------|-------------------------------------------------------|----------------------|----------------------------------------------------|-------------------------|----------------------------------------------------------------|---------------------------------|-----------------------------|----------------------------------------|----------------------------------------------|------------------------------|------------------------------------|--------------------|-----------------------------|
| Karaolis-Danckert 2006 | Yes                      | No                                      | Yes                | Yes                                                   | No                   | No                                                 | Yes                     | Yes                                                            | Yes                             | Yes                         | No                                     | Yes                                          | Yes                          | Yes                                | Yes                | Acceptable                  |
| Akaboshi 2008          | Yes                      | Yes                                     | N/A                | Yes                                                   | N/A                  | N/A                                                | Yes                     | Yes                                                            | Yes                             | Yes                         | No                                     | No                                           | Yes                          | Yes                                | N/D                | Acceptable                  |
| Hui 2008               | Yes                      | Yes                                     | Yes                | Yes                                                   | No                   | Yes                                                | Yes                     | Yes                                                            | Yes                             | Yes                         | Yes                                    | Yes                                          | Yes                          | No                                 | Yes                | High                        |
| Demerath 2009          | Yes                      | Yes                                     | Yes                | Yes                                                   | No                   | Yes                                                | Yes                     | Yes                                                            | Yes                             | Yes                         | No                                     | Yes                                          | Yes                          | No                                 | Yes                | Acceptable                  |
| Goodell 2009           | Yes                      | Yes                                     | N/A                | Yes                                                   | N/A                  | N/A                                                | Yes                     | Yes                                                            | Yes                             | Yes                         | Yes                                    | No                                           | Yes                          | Yes                                | Yes                | Acceptable                  |
| Heppe 2013             | Yes                      | Yes                                     | Yes                | Yes                                                   | No                   | No                                                 | Yes                     | Yes                                                            | Yes                             | Yes                         | Yes                                    | Yes                                          | Yes                          | No                                 | Yes                | High                        |
| Fujita 2013            | Yes                      | Yes                                     | N/A                | Yes                                                   | N/A                  | N/A                                                | Yes                     | Yes                                                            | Yes                             | Yes                         | Yes                                    | No                                           | Yes                          | No                                 | Yes                | Acceptable                  |
| Odegaard 2013          | Yes                      | Yes                                     | N/D                | Yes                                                   | N/D                  | Yes                                                | Yes                     | Yes                                                            | Yes                             | Yes                         | Yes                                    | No                                           | Yes                          | No                                 | Yes                | Acceptable                  |
| Taal 2013              | Yes                      | Yes                                     | Yes                | Yes                                                   | No                   | No                                                 | Yes                     | Yes                                                            | Yes                             | Yes                         | Yes                                    | Yes                                          | Yes                          | No                                 | Yes                | High                        |
| Webster 2013           | Yes                      | Yes                                     | Yes                | Yes                                                   | No                   | No                                                 | Yes                     | Yes                                                            | Yes                             | Yes                         | No                                     | No                                           | No                           | No                                 | Yes                | Low                         |
| Weng 2013              | Yes                      | Yes                                     | N/D                | Yes                                                   | No                   | No                                                 | Yes                     | Yes                                                            | Yes                             | Yes                         | No                                     | Yes                                          | Yes                          | Yes                                | Yes                | Acceptable                  |
| Goncalves 2014         | Yes                      | Yes                                     | N/D                | N/A                                                   | No                   | Yes                                                | Yes                     | Yes                                                            | Yes                             | Yes                         | No                                     | Yes                                          | Yes                          | No                                 | Yes                | Acceptable                  |
| Salgin 2015            | Yes                      | Yes                                     | Yes                | N/A                                                   | No                   | No                                                 | Yes                     | Yes                                                            | Yes                             | Yes                         | No                                     | Yes                                          | No                           | No                                 | Yes                | Low                         |
| Sutharsan 2015         | Yes                      | Yes                                     | Yes                | N/A                                                   | No                   | yes                                                | Yes                     | Yes                                                            | No                              | Yes                         | Yes                                    | Yes                                          | Yes                          | No                                 | Yes                | Acceptable                  |
| Nanri 2016             | Yes                      | Yes                                     | N/A                | Yes                                                   | N/A                  | N/A                                                | Yes                     | Yes                                                            | Yes                             | Yes                         | Yes                                    | No                                           | yes                          | No                                 | yes                | Acceptable                  |
| Zhou 2016              | Yes                      | Yes                                     | Yes                | Yes                                                   | No                   | Yes                                                | Yes                     | Yes                                                            | Yes                             | Yes                         | No                                     | Yes                                          | Yes                          | Yes                                | Yes                | High                        |

<sup>1</sup>N/A: not applicable, N/D: not described

<sup>a</sup>Whether subjects were free of the outcome at the baseline of the study does not apply in some studies, as anthropometric measures reflect long term existing conditions.

<sup>b</sup>Assessment of outcome was blinded to exposure in all studies, as researchers would not know who experienced rapid weight gain.

<sup>c</sup>Studies that examined multiple period of rapid weight gain from birth received yes for this item.

<sup>d</sup>Studies that considered both child and maternal factors received yes for this item.

<sup>e</sup>Studies met majority of items and conclusions unlikely to be changed by further research is rated as High

Studies met most items and conclusions may change in the light of further studies is rated as Acceptable

Studies met did not meet most items, and conclusions likely to change in the light of further studies is rated as Low

Supplementary table 1b. Quality assessment for case-control studies examining the association between rapid weight gain during infancy and later adiposity outcome

| Reference       | Clearly focused question | Cases/controls are taken from comparable populations | Same exclusion criteria applied | Participation rate of each group | Comparison made between participants and non-participants | Cases are clearly defined and differentiated from the controls | Controls are non-cases | Assessors are blinded to exposure | Assessment of exposure reliable | Adequate consideration for confounding | Confidence interval provided | Sample size justification or power description | Declare of funding | Quality rating |
|-----------------|--------------------------|------------------------------------------------------|---------------------------------|----------------------------------|-----------------------------------------------------------|----------------------------------------------------------------|------------------------|-----------------------------------|---------------------------------|----------------------------------------|------------------------------|------------------------------------------------|--------------------|----------------|
| Rathnayake 2013 | Yes                      | Yes                                                  | N/D                             | N/D                              | Yes                                                       | Yes                                                            | Yes                    | Yes                               | Yes                             | Yes                                    | Yes                          | Yes                                            | Yes                | Acceptable     |

N/D: not described
